# Supplementary material for: Lymphoblast Oxidative Stress Genes as Potential Biomarkers of Disease Severity and Drug Effect in Friedreich's Ataxia
Source: PLoS One. 2016 Apr 14;11(4):e0153574. doi: 10.1371/journal.pone.0153574 (PMC4831832; doi:10.1371/journal.pone.0153574)
Supplement: S3 File — Protein level confirmation of secondary screen. (XLSX) [file pone.0153574.s003.xlsx]

## Sheet: Fxn
Genotype	Tubulin	Protein (ug)	Signal 1
Patient	14518	30	30000000
Patient	15850	30	36300000
Patient	16214	30	29700000
Patient	16216	30	35400000
Patient	16220	30	34200000
Control	02131	30	34100000
Control	02184	30	32700000
Control	03715	30	37400000
Control	13068	30	41800000
Genotype	Fxn	Protein (ug)	Signal 1		Genotype	Fxn/Tubulin	Protein (ug)	Signal 1			Average of genotype	Signal	StDev		P-Value	2 tail T-Test
Patient	14518	30	167000		Patient	14518	30	0.00556667			Patient	0.0341678	0.0255759		Patient v Control	0.0182162
Patient	15850	30	1790000		Patient	15850	30	0.0493113			Control	0.227548	0.087756
Patient	16214	30	642000		Patient	16214	30	0.0216162
Patient	16216	30	2490000		Patient	16216	30	0.070339				0.150156
Patient	16220	30	821000		Patient	16220	30	0.0240058
Control	02131	30	11100000		Control	02131	30	0.325513
Control	02184	30	8570000		Control	02184	30	0.26208
Control	03715	30	4460000		Control	03715	30	0.119251
Control	13068	30	8500000		Control	13068	30	0.203349

## Sheet: EPX
Genotype	Tubulin	Protein (ug)	Signal 1
Patient	14518	50	20900000
Patient	16214	50	25500000
Patient	16216	50	23500000
Patient	16220	50	21500000
Control	2131	50	18400000
Control	2184	50	21800000
Control	3715	50	23200000
Control	13068	50	25300000
Genotype	EPX	Protein (ug)	Signal 1		Genotype	EPX/Tubulin	Protein (ug)	Signal 1			Average of genotype	Signal	StDev		P-Value	2 tail T-Test
Patient	14518	50	63800		Patient	14518	50	0.00305263			Patient	0.00328232	0.000694993		Patient vs Control	0.193531
Patient	16214	50	61900		Patient	16214	50	0.00242745			Control	0.00267305	0.000458004
Patient	16216	50	94500		Patient	16216	50	0.00402128
Patient	16220	50	78000		Patient	16220	50	0.00362791
Control	2131	50	47800		Control	2131	50	0.00259783
Control	2184	50	55600		Control	2184	50	0.00255046
Control	3715	50	76900		Control	3715	50	0.00331466
Control	13068	50	56400		Control	13068	50	0.00222925

## Sheet: PREX1
Genotype	Tubulin	Protein (ug)	Signal 1
Patient	14518	50	19500000
Patient	16214	50	25800000
Patient	16216	50	21400000
Patient	16220	50	20300000
Control	2131	50	16900000
Control	2184	50	20800000
Control	3715	50	21300000
Control	13068	50	26200000
Genotype	PREX1	Protein (ug)	Signal 1		Genotype	PREX1/Tubulin	Protein (ug)	Signal 1			Average of genotype	Signal	StDev		P-Value	2 tail T-Test
Patient	14518	50	1080000		Patient	14518	50	0.0553846			Patient	0.0571675	0.00613974		Patient vs Control	0.021585
Patient	16214	50	1630000		Patient	16214	50	0.0631783			Control	0.0428169	0.00699862
Patient	16216	50	1300000		Patient	16216	50	0.0607477
Patient	16220	50	1002000		Patient	16220	50	0.0493596
Control	2131	50	615000		Control	2131	50	0.0363905
Control	2184	50	831000		Control	2184	50	0.0399519
Control	3715	50	900000		Control	3715	50	0.0422535
Control	13068	50	1380000		Control	13068	50	0.0526718

## Sheet: NCF2
Genotype	Tubulin	Protein (ug)	Signal 1
Patient	14518	30	26400000
Patient	15850	30	26700000
Patient	16214	30	27700000
Patient	16216	30	24500000
Patient	16220	30	20100000
Control	02131	30	37700000
Control	02184	30	38700000
Control	03715	30	21000000
Control	13068	30	19200000
Genotype	Noxa2	Protein (ug)	Signal 1		Genotype	Noxa2/Tubulin	Protein (ug)	Signal 1			Average of genotype	Signal	StDev		P-Value	2 tail T-Test
Patient	14518	30	2780000		Patient	14518	30	0.105303			Patient	0.0735337	0.0258109		Patient v Control	0.0323315
Patient	15850	30	888000		Patient	15850	30	0.0332584			Control	0.205069	0.0738942
Patient	16214	30	2150000		Patient	16214	30	0.0776173
Patient	16216	30	1810000		Patient	16216	30	0.0738776
Patient	16220	30	1560000		Patient	16220	30	0.0776119
Control	02131	30	10300000		Control	02131	30	0.27321				0.35858
Control	02184	30	8970000		Control	02184	30	0.231783
Control	03715	30	4510000		Control	03715	30	0.214762
Control	13068	30	1930000		Control	13068	30	0.100521

## Sheet: PRDX2
Genotype	Tubulin	Protein (ug)	Signal 1
Patient	14518	50	19200000
Patient	16214	50	24300000
Patient	16216	50	20100000
Patient	16220	50	20100000
Control	2131	50	16700000
Control	2184	50	18800000
Control	3715	50	20200000
Control	13068	50	24600000
Genotype	PRDX2	Protein (ug)	Signal 1		Genotype	PRDX2	Protein (ug)	Signal 1			Average of genotype	Signal	StDev		P-Value	2 tail T-Test
Patient	14518	50	16800000		Patient	14518	50	0.875			Patient	0.763065	0.156552		Patient vs Control	0.199147
Patient	16214	50	14100000		Patient	16214	50	0.580247			Control	0.937166	0.183647
Patient	16216	50	18300000		Patient	16216	50	0.910448
Patient	16220	50	13800000		Patient	16220	50	0.686567
Control	2131	50	14700000		Control	2131	50	0.88024
Control	2184	50	20000000		Control	2184	50	1.06383
Control	3715	50	14200000		Control	3715	50	0.70297
Control	13068	50	27100000		Control	13068	50	1.10163

## Sheet: GPX2
Genotype	Tubulin	Protein (ug)	Signal 1
Patient	14518	30	3090000
Patient	16214	30	12100000
Patient	16216	30	4950000
Patient	16220	30	5680000
Control	02131	30	8360000
Control	02184	30	4950000
Control	03715	30	4770000
Control	13068	30	8800000
Genotype	Noxa2	Protein (ug)	Signal 1		Genotype	Noxa2/Tubulin	Protein (ug)	Signal 1			Average of genotype	Signal	StDev		P-Value	2 tail T-Test
Patient	14518	30	705000		Patient	14518	30	0.228155			Patient	0.132544	0.0682979		Patient v Control	0.778129
Patient	16214	30	1480000		Patient	16214	30	0.122314			Control	0.121672	0.027889
Patient	16216	30	561000		Patient	16216	30	0.113333
Patient	16220	30	377000		Patient	16220	30	0.0663732
Control	02131	30	1210000		Control	02131	30	0.144737
Control	02184	30	725000		Control	02184	30	0.146465
Control	03715	30	488000		Control	03715	30	0.102306
Control	13068	30	820000		Control	13068	30	0.0931818

## Sheet: PDLIM1
Genotype	Tubulin	Protein (ug)	Signal 1
Patient	14518	50	18300000
Patient	16214	50	23700000
Patient	16216	50	20700000
Patient	16220	50	19900000
Control	2131	50	15500000
Control	2184	50	19700000
Control	3715	50	20700000
Control	13068	50	24200000
Genotype	GPX2	Protein (ug)	Signal 1		Genotype	GPX2/Tubulin	Protein (ug)	Signal 1			Average of genotype	Signal	StDev		P-Value	2 tail T-Test
Patient	14518	50	13900000		Patient	14518	50	0.759563			Patient	0.619135	0.0958452		Patient vs Control	0.0226969
Patient	16214	50	12900000		Patient	16214	50	0.544304			Control	0.458052	0.0449209
Patient	16216	50	12000000		Patient	16216	50	0.57971
Patient	16220	50	11800000		Patient	16220	50	0.592965				1.35167
Control	2131	50	6890000		Control	2131	50	0.444516
Control	2184	50	8510000		Control	2184	50	0.43198
Control	3715	50	8920000		Control	3715	50	0.430918
Control	13068	50	12700000		Control	13068	50	0.524793

## Sheet: RNF7
Genotype	Tubulin	Protein (ug)	Signal 1
Patient	14518	50	23500000
Patient	16214	50	27800000
Patient	16216	50	24500000
Patient	16220	50	22400000
Control	2131	50	21500000
Control	2184	50	23300000
Control	3715	50	24500000
Control	13068	50	27000000
Genotype	GPX2	Protein (ug)	Signal 1		Genotype	GPX2/Tubulin	Protein (ug)	Signal 1			Average of genotype	Signal	StDev		P-Value	2 tail T-Test
Patient	14518	50	264000		Patient	14518	50	0.011234			Patient	0.0112926	0.00152196		Patient vs Control	0.756489
Patient	16214	50	293000		Patient	16214	50	0.0105396			Control	0.0106009	0.0039801
Patient	16216	50	244000		Patient	16216	50	0.00995918
Patient	16220	50	301000		Patient	16220	50	0.0134375
Control	2131	50	286000		Control	2131	50	0.0133023
Control	2184	50	136000		Control	2184	50	0.00583691
Control	3715	50	217000		Control	3715	50	0.00885714
Control	13068	50	389000		Control	13068	50	0.0144074

## Sheet: SFTPD
Genotype	Tubulin	Protein (ug)	Signal 1
Patient	14518	30	3030000
Patient	16214	30	11500000
Patient	16216	30	3950000				Patient					control
Patient	16220	30	6060000				0.0349	0.037	0.0308	0.0376		0.0734	0.0915	0.0935	0.0428
Control	02131	30	7810000
Control	02184	30	3920000				0.465803	0.0145373
Control	03715	30	3700000
Control	13068	30	9070000
Genotype	Noxa2	Protein (ug)	Signal 1		Genotype	Noxa2/Tubulin	Protein (ug)	Signal 1			Average of genotype	Signal	StDev		P-Value	2 tail T-Test
Patient	14518	30	2760		Patient	14518	30	0.000910891			Patient	0.0023037	0.00109666		Patient v Control	0.348334
Patient	16214	30	25100		Patient	16214	30	0.00218261			Control	0.00306405	0.00101616
Patient	16216	30	10100		Patient	16216	30	0.00255696
Patient	16220	30	21600		Patient	16220	30	0.00356436
Control	02131	30	24100		Control	02131	30	0.00308579
Control	02184	30	16700		Control	02184	30	0.0042602
Control	03715	30	11600		Control	03715	30	0.00313514
Control	13068	30	16100		Control	13068	30	0.00177508

## Sheet: MB
Genotype	Tubulin	Protein (ug)	Signal 1
Patient	14518	30	32100000
Patient	15850	30	38900000
Patient	16214	30	31800000
Patient	16216	30	34000000
Patient	16220	30	31100000
Control	02131	30	40000000
Control	02184	30	36500000
Control	03715	30	38000000
Control	13068	30	34500000
Genotype	MB	Protein (ug)	Signal 1		Genotype	MB/Tubulin	Protein (ug)	Signal 1			Average of genotype	Signal	StDev		P-Value	2 tail T-Test
Patient	14518	30	422000		Patient	14518	30	0.0131464			Patient	0.0146508	0.00336157		Patient v Control	0.679125
Patient	15850	30	753000		Patient	15850	30	0.0193573			Control	0.0161198	0.00593518
Patient	16214	30	354000		Patient	16214	30	0.0111321
Patient	16216	30	573000		Patient	16216	30	0.0168529
Patient	16220	30	397000		Patient	16220	30	0.0127653
Control	02131	30	534000		Control	02131	30	0.01335
Control	02184	30	906000		Control	02184	30	0.0248219
Control	03715	30	558000		Control	03715	30	0.0146842
Control	13068	30	401000		Control	13068	30	0.0116232

[truncated: 2 more sheets: Prdx5, Correlation]
